# Supplementary material
Source: bioRxiv or medRxiv preprint supplement (https://www.biorxiv.org/highwire/filestream/169/field_highwire_adjunct_files/2/000653-3.pdf)
Supplement: Supplementary file [file 000653-3.pdf]

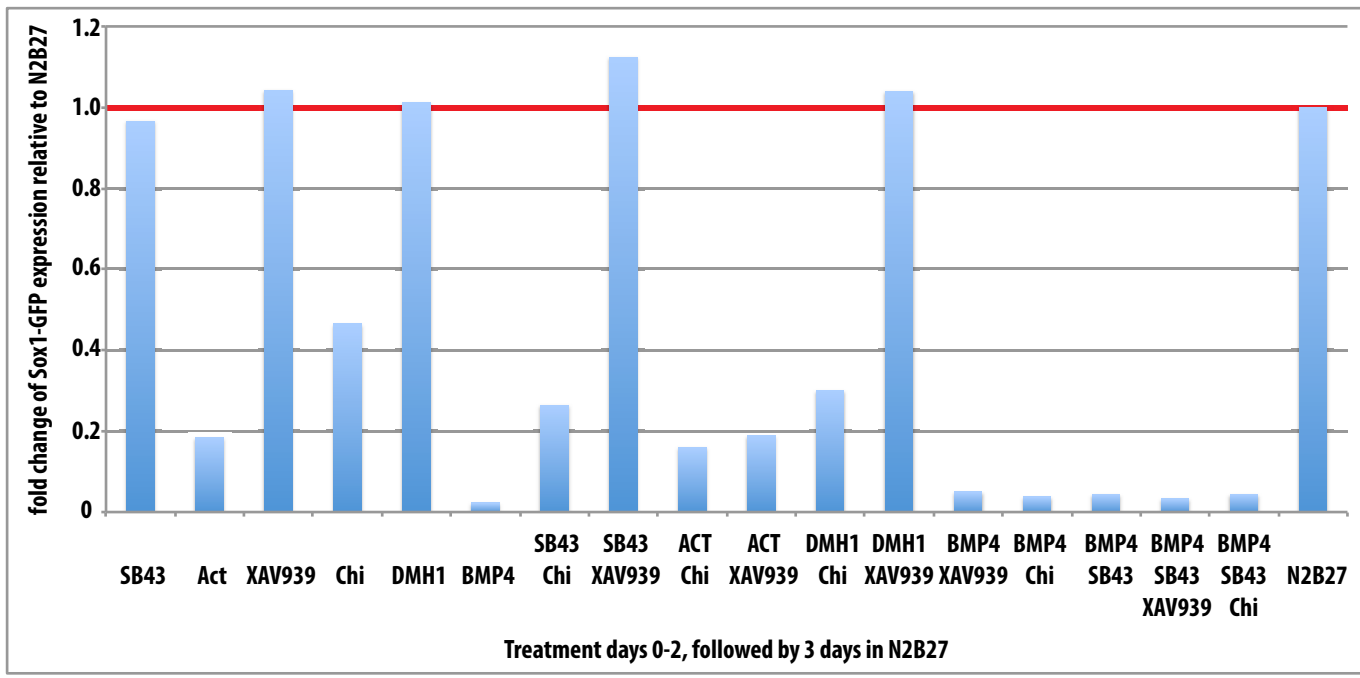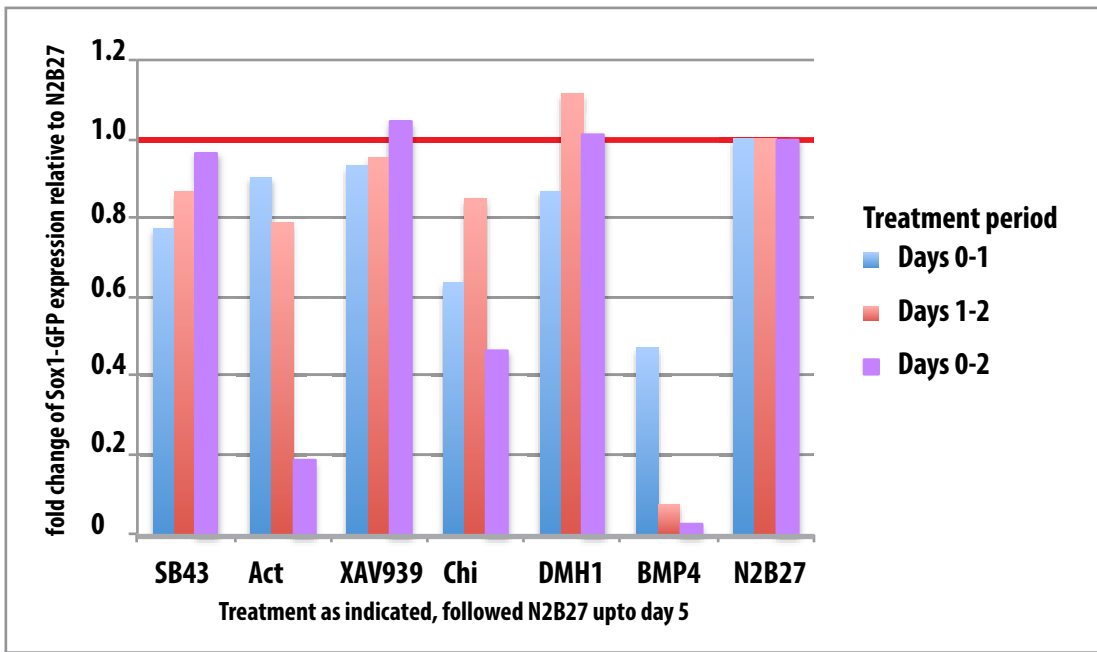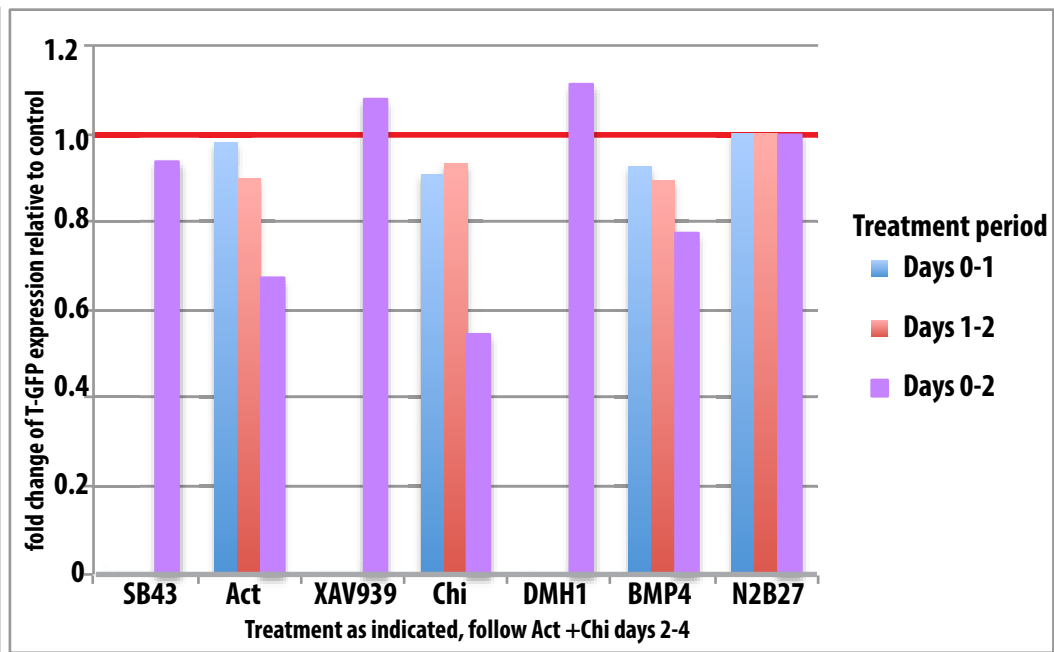

**Supplementary Data for Figure 2**

(A) Sox1::GFP cells were cultured in the indicated factors days 0-2, followed by days 2-5 in N2B27. (B-C) Sox1::GFP (B) or T::GFP(C) cells were maintained in N2B27 for 5 days (Sox1::GFP) or 2 days in N2B27, followed by 2 days in AC (T::GFP) and exposed to pulses of the treatment as indicated. GFP expression was analyzed by flow cytometry and results were normalized to 5 days in N2B27 (Sox1::GFP) or 2 days N2B27 followed by 2days AC (T::GFP). Note the effect of the factors and treatments have remarkably similar effects on GFP expression in both Sox1::GFP cells and T::GFP cells.
